# Supplementary material
Source: publisher figshare collection journal article supplement (https://adisjournals.figshare.com/ndownloader/files/35051710)
Supplement: Supplementary file 1 [file 35051710]

## Pacritinib: Adis Evaluation

### Key Points

- An oral kinase inhibitor is being developed by CTI BioPharma for the treatment of myelofibrosis and graft-versus-host disease
- Received its first approval on 28 February 2022 in the USA
- Approved for use in the treatment of adults with intermediate- or high-risk primary or secondary (post-polycythemia vera or post-essential thrombocythemia) myelofibrosis with a platelet count below  $50 \times 10^9/L$

### Summary

Pacritinib (VONJO™) is an orally administered, small molecule kinase inhibitor being developed by CTI BioPharma for the treatment of myelofibrosis and graft-versus-host disease. Pacritinib received its first approval in February 2022 in the USA for the treatment of adults with intermediate- or high-risk primary or secondary (post-polycythemia vera or post-essential thrombocythemia) myelofibrosis with a platelet count below  $50 \times 10^9/L$ . The accelerated approval was based on results from the randomized, active-controlled, phase III PERSIST-2 trial, in which spleen volume reduction was demonstrated in pacritinib recipients. This article summarizes the milestones in the development of pacritinib leading to this first approval for myelofibrosis.

This summary represents the opinions of the author. For a full list of declarations, including funding and author disclosure statements, please see the full text online. © Springer Nature Switzerland AG 2022.
